# Supplementary material for: Linear viscoelasticity of soft glassy materials
Source: Royal Society of Chemistry journal article supplement (doi:10.1039/c3sm52978a), 2014-01-01
Supplement: c3sm52978a.pdf [file c3sm52978a.pdf]

### Supplementary information:

#### Linear Viscoelasticity of Soft Glassy Materials

Manish Kaushal, Yogesh M. Joshi\*

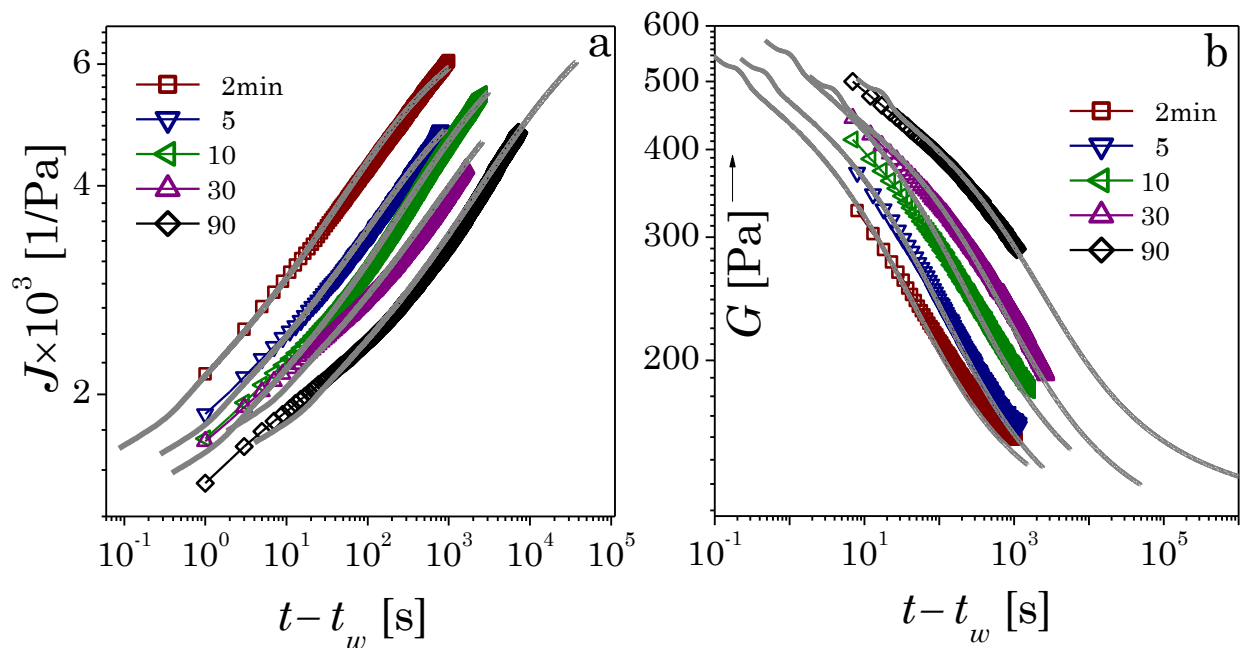

**Figure S1:** Compliance (a), and stress relaxation modulus (b) for Emulsion paint is plotted as a function of time subsequent to application of step stress and step strain respectively at different  $t_w$ . Solid lines in (a) show the predictions of compliance data obtained from stress relaxation modulus data shown in (b), and solid lines in (b) show the predictions of stress relaxation modulus obtained from compliance data shown in (a) using equations (3) and (4).

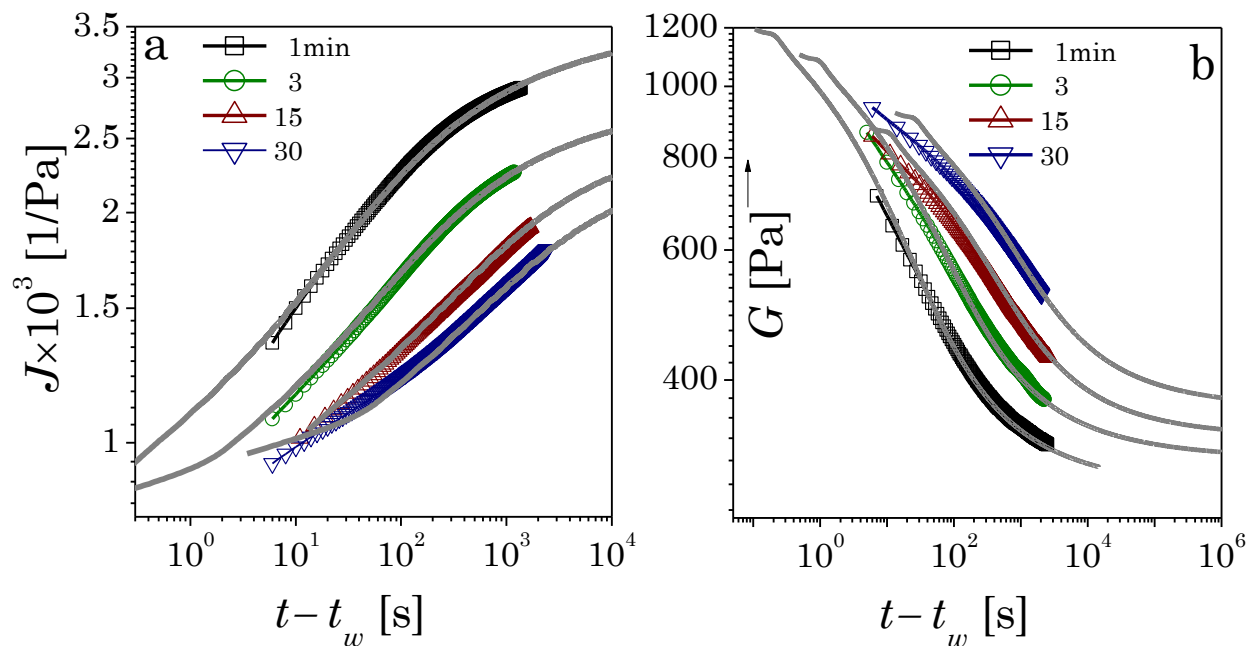

**Figure S2:** Compliance (a), and stress relaxation modulus (b) associated with Clay-nanocomposite is plotted as a function of time subsequent to application of step stress and step strain respectively at different  $t_w$ . Solid lines in (a) are the predictions of compliance data obtained from stress relaxation modulus data shown in (b), and solid lines in (b) are the predictions of stress relaxation modulus obtained from compliance data shown in (a) using equations (3) and (4).

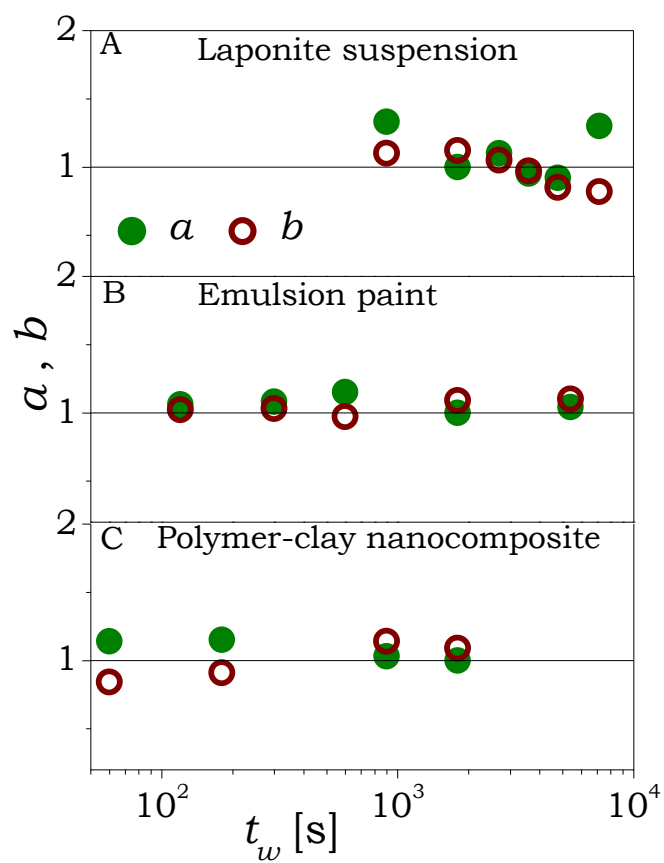

**Figure S3:** Vertical shift factors  $a$  (for creep compliance, closed circles) and  $b$  (for stress relaxation modulus, open circles) to get superposition shown in figures 2 and 3 are plotted as a function of waiting time  $t_w$  for Laponite suspension (A), Emulsion paint (B), and Polymer-clay nanocomposite (C).
